# Supplementary material for: Imaging transplanted stem cells in real time using an MRI dual-contrast method
Source: PubMed Central journal article supplement (PMC4556978; doi:10.1038/srep13628), 2015-09-02
Supplement: srep13628-s1.pdf [file srep13628-s1.pdf]

# **Imaging transplanted stem cells in real time using an MRI dual-contrast method**

Ethel J. Ngen<sup>1</sup>, Lee Wang<sup>1</sup>, Yoshinori Kato<sup>1,2</sup>, Balaji Krishnamachary<sup>1</sup>, Wenlian Zhu<sup>1</sup>, Nishant Gandhi<sup>3</sup>, Barbara Smith<sup>4</sup>, Michael Armour<sup>3</sup>, John Wong<sup>3</sup>, Kathleen Gabrielson<sup>5</sup>, Dmitri Artemov<sup>1,2,\*</sup>

<sup>1</sup> The *In vivo* Cellular and Molecular Imaging Center, Division of Cancer Imaging Research, Russell H. Morgan Department of Radiology and Radiological Sciences, The Johns Hopkins University School of Medicine, Baltimore, MD21218, USA.

<sup>2</sup> The Sidney Kimmel Comprehensive Cancer Center, The Johns Hopkins University School of Medicine, Baltimore, MD21218, USA.

<sup>3</sup> The Department of Radiation Oncology and Molecular Radiation Sciences, The Johns Hopkins University School of Medicine, Baltimore, MD21218, USA.

<sup>4</sup> The Institute for Basic Biomedical Sciences, The Johns Hopkins University School of Medicine, Baltimore, MD21218, USA.

<sup>5</sup> The Department of Molecular and Comparative Pathobiology, The Johns Hopkins University School of Medicine, Baltimore, MD21218, USA.

\*Correspondence should be addressed to: Dmitri Artemov, Ph.D. ([Dmitri@mri.jhu.edu](mailto:Dmitri@mri.jhu.edu))

## **Supplementary Methods**

|                         |   |
|-------------------------|---|
| Supplementary Method S1 | 3 |
| Supplementary Method S2 | 4 |
| Supplementary Method S3 | 5 |
| Supplementary Method S4 | 6 |

## **Supplementary Figures**

|                          |    |
|--------------------------|----|
| Supplementary Figure S1  | 7  |
| Supplementary Figure S2  | 8  |
| Supplementary Figure S3  | 8  |
| Supplementary Figure S4  | 9  |
| Supplementary Figure S5  | 12 |
| Supplementary Figure S6  | 12 |
| Supplementary Figure S7  | 13 |
| Supplementary Figure S8  | 14 |
| Supplementary Figure S9  | 15 |
| Supplementary Figure S10 | 16 |
| Supplementary Figure S11 | 17 |

## Supplementary Methods

### S1. Lentivirus production and stem cell transduction

An infectious viral supernatant was generated by transiently co-transfecting 12 µg of the lentiviral vector containing the gene of interest pHIV-EF-1α-IRES-Luciferase (Addgene), and 6 µg of the packaging vector (pPGKΔR8.2 DVPR), into HEK293T cells. The viral supernatant was collected at 48, 72, and 96 h post transfection, and was then pooled and concentrated using an Amicon Ultra-15 100K cutoff filter (Millipore Billerica). The viral titer was then determined using a p24 ELISA kit (Cell Biolabs Inc.), to detect the HIV-p24 core protein of the vector. Following this, human mesenchymal stem cells were transduced for 24 h with the lentiviral vector, at a multiplicity of infection of 2, using 0.1% polybrene (Sigma-Aldrich) in mesenchymal stem cell growth media (MSCGM), without antibiotics.

To evaluate the correlation between the number of viable cells and the BLI radiance, luciferase-expressing cells were seeded in 10 cm dishes, at a cell density of  $5 \times 10^3$  cells/cm<sup>2</sup>, and grown to 85% confluency. The cells were then harvested, counted, and varying numbers, ranging from  $5 \times 10^3$  to  $4 \times 10^4$  cells, were placed in eight-well chamber slides. One hour later, 15 µg/mL of luciferin (PerkinElmer) was added to each well and the plate was read 30 min after luciferin addition (Supplementary Fig. S2).

## **S2. Assessment of cognitive decline using the signaled fear conditioning paradigm**

All procedures were conducted in standard mice operant conditioning chambers (Med Associates Inc.) in accordance with the Johns Hopkins Behavioral Core protocol with a few modifications. Behavioral studies were done in a series of five sessions: an acclimatization session; a conditioning session; a short-term contextual fear memory assessment session; a long-term contextual fear memory assessment session; and a pre-cued and cued testing session.

Briefly, mice were initially placed in the conditioning chambers for five minutes and then returned to their cages. One hour following acclimatization, the mice were returned to the conditioning chambers where a tone (2000 Hz) was played three minutes post placement for 30 s. This was immediately followed by a foot-shock using scrambled alternating current delivered through the grid floor by a constant current shock source (5 mA) for two seconds. The mice were returned to their cages after a total of five minutes. One hour following the conditioning session, the short-term contextual fear memory of the mice was assessed. During this session, the mice were returned to the conditioning chambers for five minutes during which neither tones nor shocks were administered. This was repeated, twenty-four hours following the conditioning session, to assess the long-term contextual fear memory of the mice. One hour following this, the cued fear memory was assessed by re-exposing the mice to the tone (2000 Hz, for three minutes) in a new context and in the absence of a shock. The freezing behavior of the mice during each session was then analyzed.

### **S3. Black Pixel Analyses**

Black pixel analysis was performed, with a few modifications from that described in previous reports. These modifications made the method more robust and reduced the variability observed when calculated using the method described in previous reports.

Briefly, a 2D Z-projection of the minimum signal intensity was generated from the slices of stem cell implantation. Two regions of interest (ROIs) were manually drawn over the ipsilateral hemisphere of stem cell implantation, and the contralateral hemisphere (Supplementary Fig. S7a). Pixel intensity histograms were created for each ROI and a low signal intensity pixel at the base of the distribution of the histogram (ipsilateral hemisphere of stem cell transplantation) was chosen as a threshold (Supplementary Fig. S7b). This threshold corresponded to the pixel intensity of the area around the site of stem cell implantation. The ratio of the number of low signal intensity pixels below the threshold in both hemispheres was then calculated. The value calculated at the first time-point was assigned an arbitrary 0 %. The values calculated at subsequent time-points were normalized relative to the first time-point and reported relative to this value (Supplementary Fig. S7c).

#### **S4. Bright Pixel Analyses**

Bright pixel intensity calculations were performed as follows: All slices were analyzed and the slice adjacent to that of stem cell implantation was chosen. Two regions of interest (ROIs) were manually drawn over the ipsilateral hemisphere of stem cell implantation and the contralateral hemisphere (Supplementary Fig. S10a). Pixel intensity histograms were generated for each ROI in ImageJ (Supplementary Fig. S10b). A high signal intensity pixel at the crest of the normal distribution of the histogram (of the contralateral hemisphere of stem cell transplantation) was chosen as a threshold (Supplementary Fig. S10c). This threshold represented the maximum signal intensity in the absence of cell death. The ratio of the number of pixel intensities below the threshold in both hemispheres was then calculated. The value calculated at the first time-point was assigned an arbitrary 0 %. The values calculated at subsequent time-points were normalized relative to the first time-point and reported relative to this value (Supplementary Fig. S10c).

## Supplementary Figures

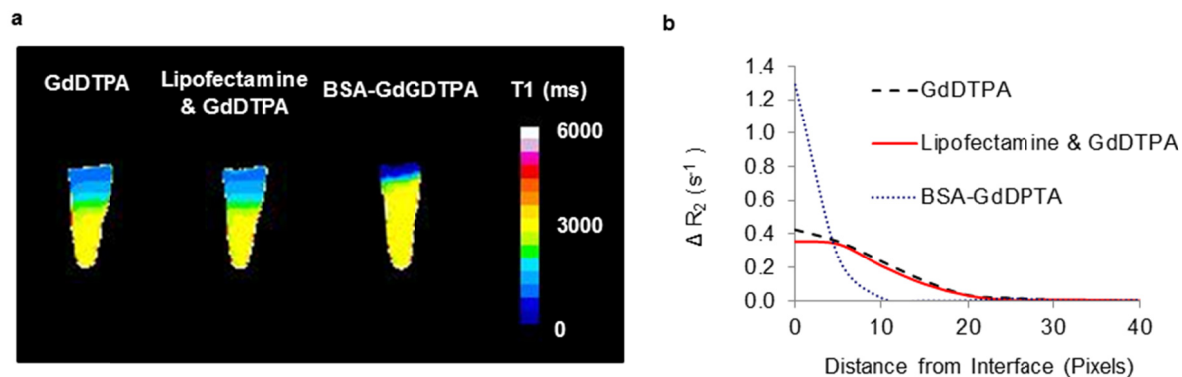

**Figure S1. Diffusion Kinetics of GdDTPA solutions in the presence and absence of a transfection agent (Lipofectamine LTR).** **a)** Respective  $T_1$  maps of GdDTPA from three solutions, one hour post solution placement on 2% (w/v) agarose gel. The solutions studied included: GdDTPA in phosphate buffered saline (PBS); GdDTPA and lipofectamine LTR in PBS (5:1:25 v/v/v ratio); and an equimolar solution of bovine serum albumin-GdDTPA (BSA-GdDTPA) in PBS. BSA-GdDTPA was used here as a high molecular weight gadolinium chelate (negative diffusion control). **b)** GdDTPA diffusion kinetic profiles of the respective solutions, one hour post solution placement on 2% (w/v) agarose gel (n=3). The diffusion kinetic profiles of the GdDTPA solutions in the presence and absence of Lipofectamine LTR were similar, and different from that of BSA-GdDTPA, the high molecular weight control, with a slow diffusion rate.

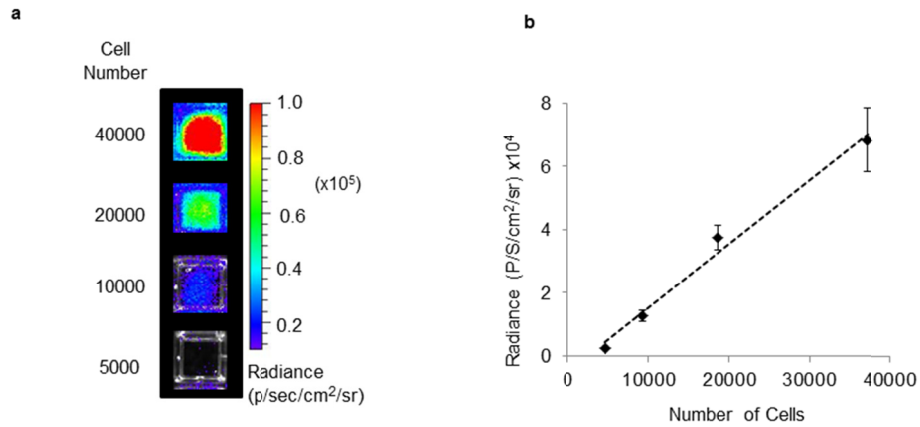

**Figure S2. BLI of luciferase transduced cells.** a) BLI radiance from varying numbers of luciferase-transduced cells. b) BLI radiance from varying numbers of luciferase-transduced cells shows a linear proportionality to the number of cells (n=2).

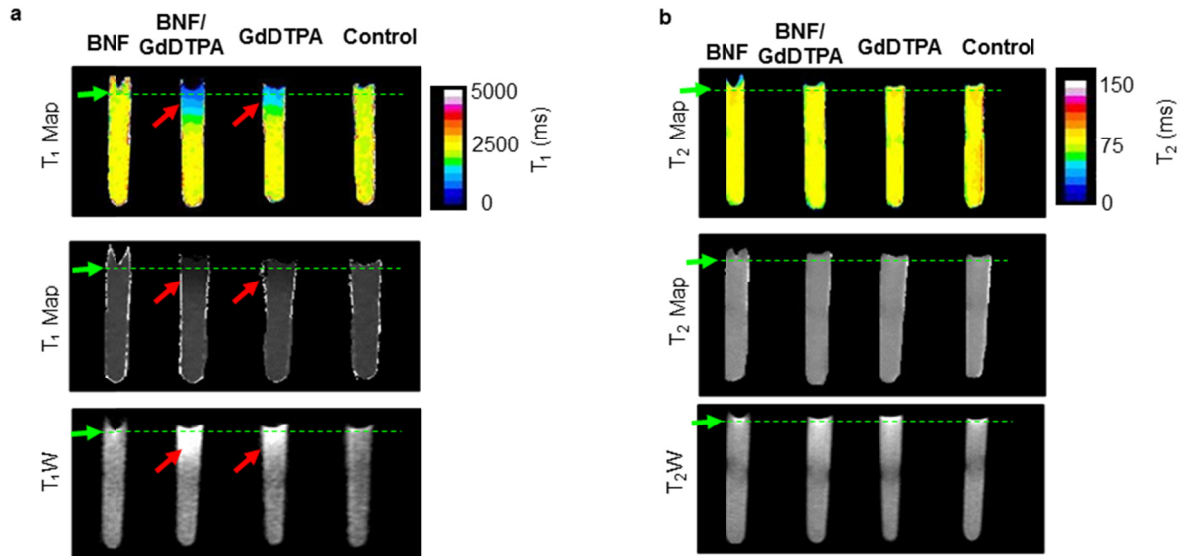

**Figure S3. Phantom imaging of cell death detection.** a) T<sub>1</sub> maps and corresponding T<sub>1</sub> images of 2% (w/v) agarose gel, on which were placed respective magnetically labelled dead cell samples (n=3). (↑) represents T<sub>1</sub> contrast enhancement in the vicinity of dead dual magnetically labelled cells. b) T<sub>2</sub> maps and corresponding T<sub>2</sub> images of 2% (w/v) agarose gel, on which were placed respective dead cell samples (n=3).



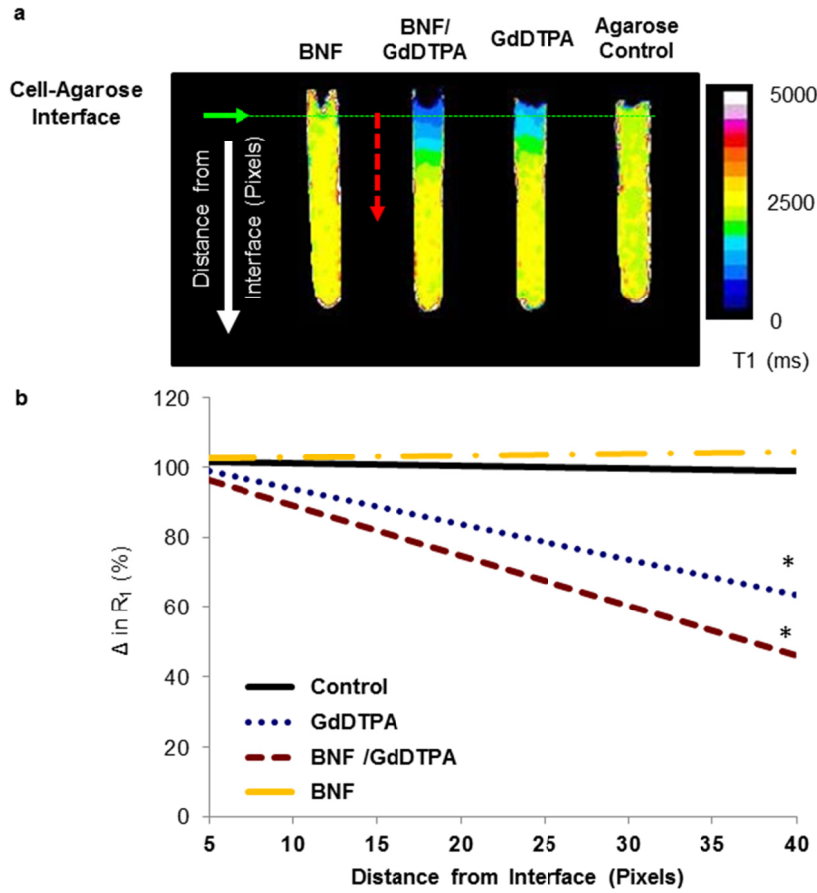

*Normalized Change in Relaxivity*

$$= \left( \frac{\text{Relaxivity } X \text{ pixels from cell - agarose interface}}{\text{Relaxivity } 5 \text{ pixels from cell - agarose interface}} \right) \times 100\%$$

**Figure S4. Cell Death Detection in Phantoms** **a)** T<sub>1</sub> maps of agarose phantoms, topped with dead labelled cells (n=3). (↑) indicates cell-agarose interface, while (↓) indicates measured distance along the tube. **b)** Normalized relaxation rate changes (mean ± s.d.), (%ΔR<sub>1</sub>) along the agarose tube (n= 3; P < 0.0001). The statistics was done using a Kruskal–Wallis one-way analysis of variance, followed by a post-hoc Scheffé test based on the Wilcoxon–Mann–Whitney-test. All samples were technical replicates.

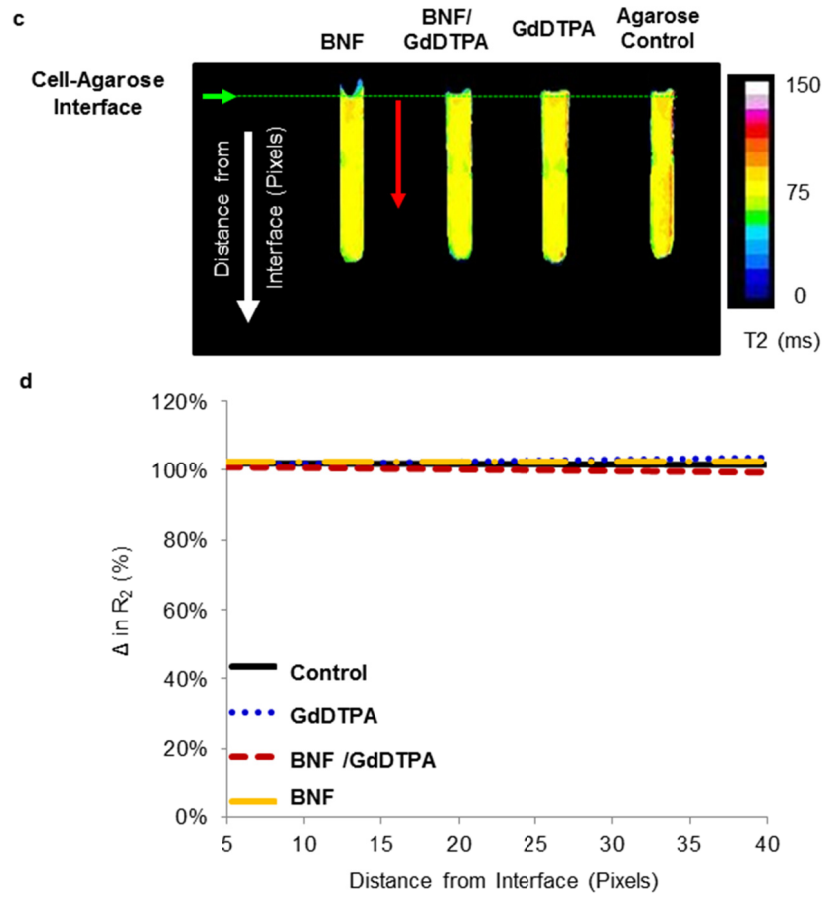

*Normalized Change in Relaxation Rate*

$$= \left( \frac{\text{Relaxation rate } X \text{ pixels from cell} - \text{agarose interface}}{\text{Relaxation rate } 5 \text{ pixels from cell} - \text{agarose interface}} \right) \times 100\%$$

**Figure S4. Cell Death Detection in Phantoms** **c)**  $T_2$  maps of agarose phantoms, topped with dead labelled cells (n=3). ( $\uparrow$ ) indicates cell-agarose interface, while ( $\downarrow$ ) indicates measured distance along the tube. **d)** Normalized relaxation rate changes (mean  $\pm$  s.d.), ( $\% \Delta R_2$ ) along the agarose tube (n=3). All samples were technical replicates.

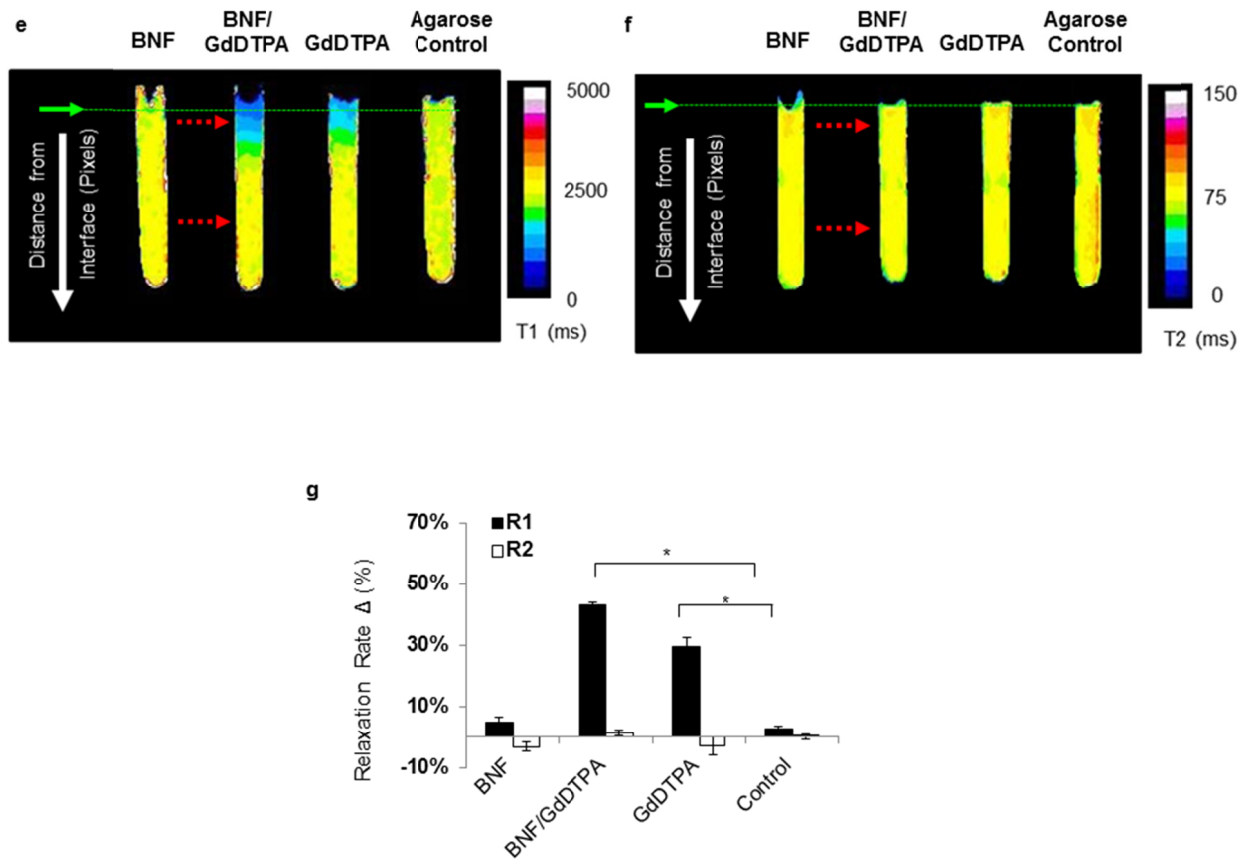

### Relaxation Rate Change

$$= (\text{Normalized relaxation rate 10 pixels from cell} - \text{agarose interface}) \\ - (\text{Normalized relaxation rate 90 Pixels from cell} - \text{agarose interface})$$

**Figure S4. Cell Death Detection in Phantoms** **e)**  $T_1$  and  $T_2$  maps of agarose phantoms, topped with dead labelled cells ( $n=3$ ). ( $\uparrow$ ) indicates cell-agarose interface, while ( $\downarrow$ ) indicates measured pixels along the tube **f)** Normalized relaxation rate changes ( $\% \Delta R_2$ ), along the agarose tube ( $n=3$ ). **g)** Relaxivity changes (mean  $\pm$  s.d.),  $\sim 10$  pixels from the cell-agarose interface in the respective tubes shown in **c** ( $n=3$ ,  $P < 0.0001$ ). The statistics was done using a Kruskal–Wallis one-way analysis of variance, followed by a post-hoc Scheffé test based on the Wilcoxon–Mann–Whitney-test. All samples were technical replicates.

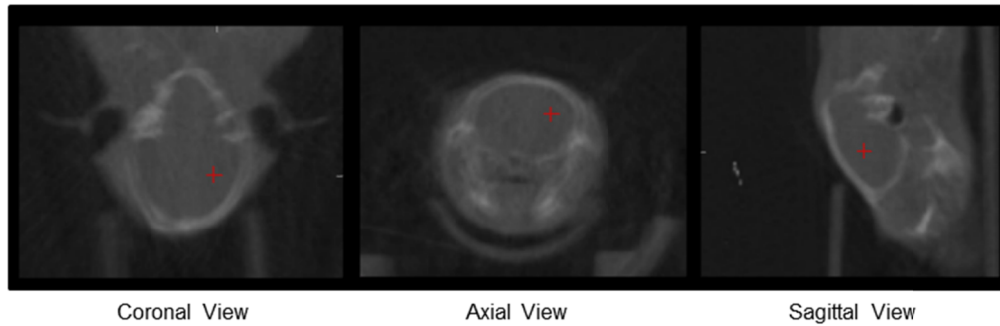

**Figure S5. Induction of radiation-induced lesions in mice:** Cone-beam CT acquisition geometry from a small animal radiation research platform (SARRP) shows a representative target irradiation beam from the: coronal; axial; and sagittal planes, respectively.

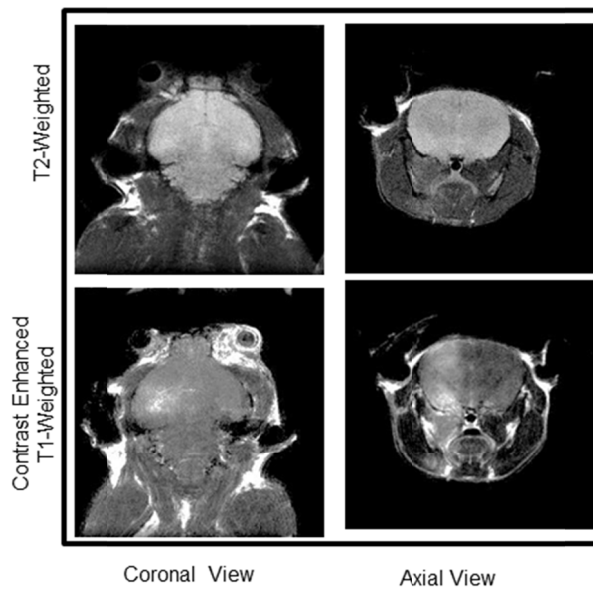

**Figure S6. Radiation-induced brain injury in mice.**  $T_2$ -weighted and contrast-enhanced,  $T_1$ -weighted MR images of a representative irradiated mouse brain, two weeks post irradiation.

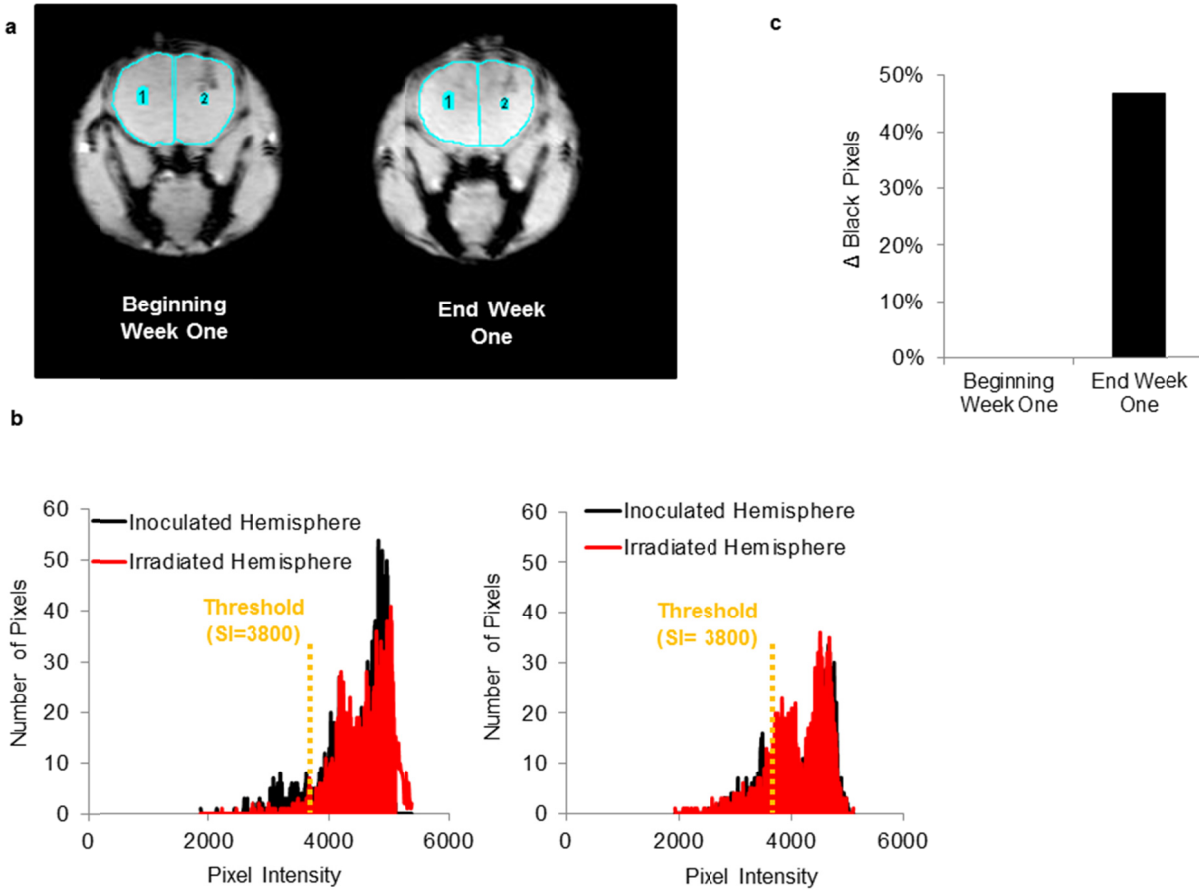

**Figure S7. Black Pixel Analyses.** **a)** Minimum signal intensity Z-projections of  $T_2^*$ -weighted images of a representative immune-deficient mouse brain, generated from the slices of stem cell implantation. Two regions of interest (ROIs) were manually drawn over the contralateral hemisphere (ROI 1) and ipsilateral hemisphere (ROI 2) of stem cell implantation. **b)** Signal intensity histograms generated from both ROIs at the beginning and end of week one. A low signal intensity pixel was chosen as a threshold. **c)** The ratio of the number of low signal intensity pixels below the threshold in both hemispheres normalized using the ratio acquired at the beginning of week one ( $n=1$ ).

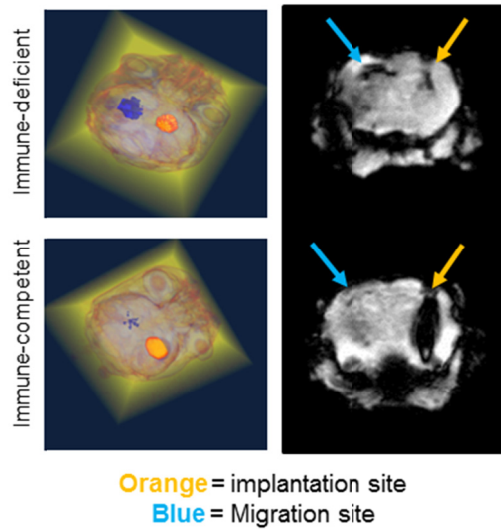

**Figure S8. Cell Distribution** c) Three-dimensional reconstruction of  $T_2^*$ -weighted MR images of brains from immune-deficient and immune-competent mice, and corresponding original and representative  $T_2^*$  slices from which the model was reconstructed. The images indicate cell distribution at both the implantation and radiation-induced lesion sites. (↑) represents the dual magnetically labelled cells lodged at the implantation site. (↑) represents the migrated dual magnetically labelled cells at the radiation-induced lesion sites.

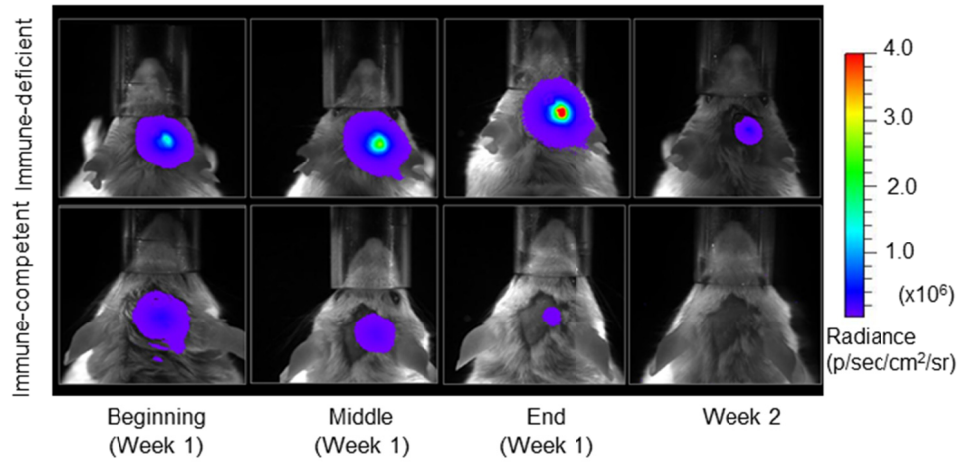

**Figure S9. Cell death in immune-deficient mice at a later time point compared to immune-competent mice.** Bioluminescence images of cell death in immune-deficient and immune-competent mice, respectively, over two weeks of stem cell transplantation

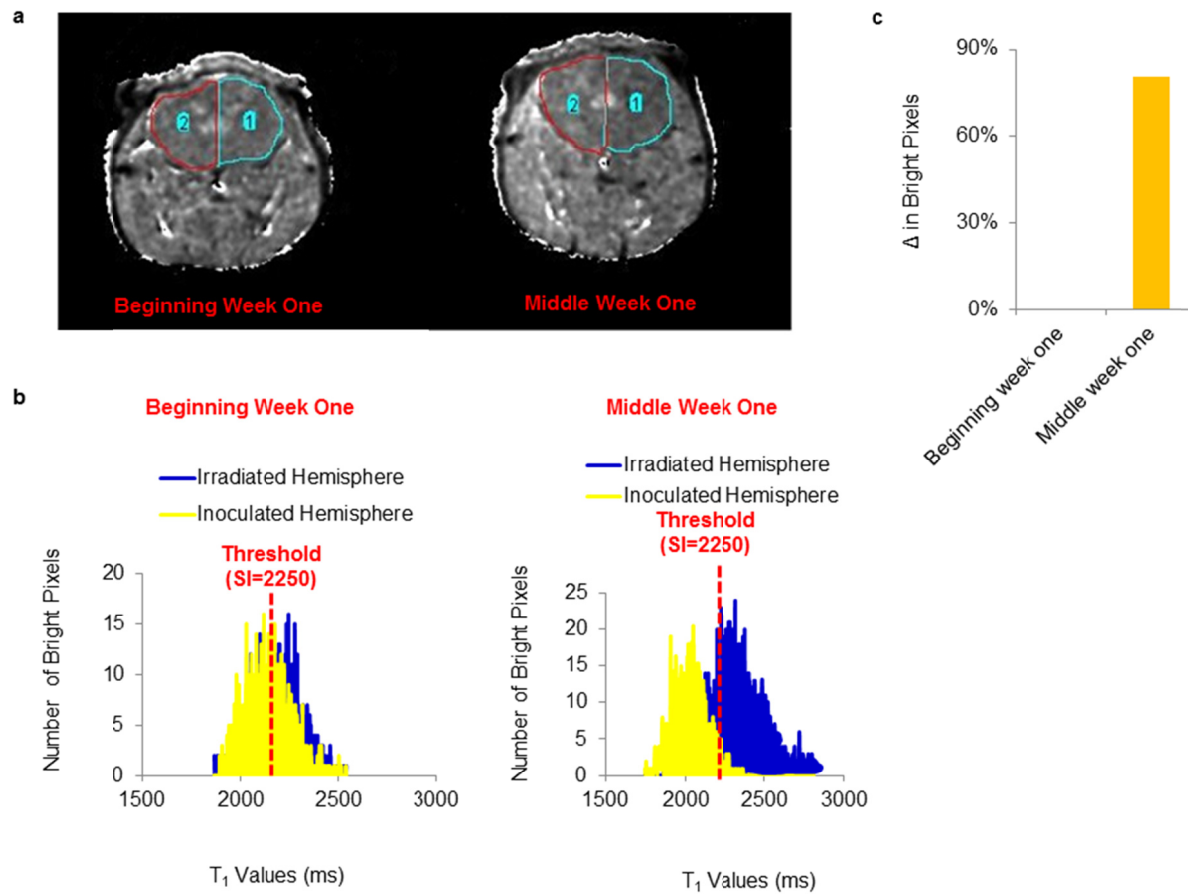

**Figure S10. Bright Pixel Analyses.** T<sub>1</sub>-maps of the slice adjacent to that of stem cell implantation in a representative immune-competent mouse. Two regions of interest (ROIs) were manually drawn over the ipsilateral hemisphere (ROI 1) and contralateral hemisphere (ROI 2) of stem cell implantation. b) Pixel intensity histograms generated from both ROIs at the beginning and end of week one. A high signal intensity pixel was chosen as a threshold. c) The ratio of bright pixels (low T<sub>1</sub> values) below the threshold in both hemispheres normalized using the ratio acquired at the beginning of week one (n=1).



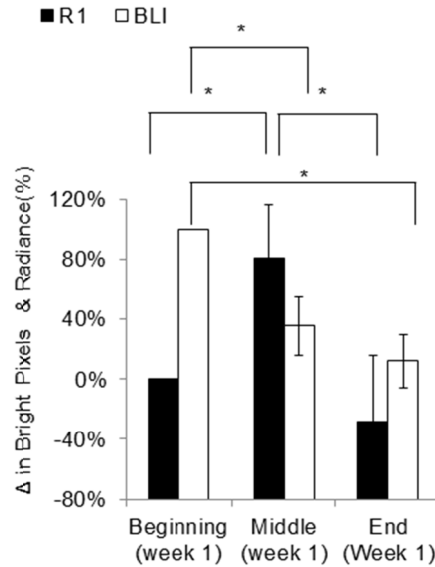

**Figure S11. Comparison of  $T_1$  contrast enhancement and BLI radiance decrease in immunocompetent mice following cell death.** Quantitative  $T_1$  contrast enhancement (mean  $\pm$  s.d.) and BLI radiance (mean  $\pm$  s.d.) in immunocompetent mice within week one of cell implantation. The statistics was assessed using a Kruskal–Wallis one-way analysis of variance, followed by a post-hoc individual comparison Scheffé test, based on the Wilcoxon-Mann-Whitney-test ( $n= 5$ ;  $P < 0.05$ ).
